# Supplementary material
Source: ML conference proceedings conference paper supplement (https://proceedings.neurips.cc/paper_files/paper/2023/hash/899511e37a8e01e1bd6f6f1d377cc250-Abstract.html)
Supplement: Supplementary file 1 [file 899511e37a8e01e1bd6f6f1d377cc250-Supplemental-Conference.zip]

Archive with 2 entries (2 files):
- appendix.pdf
- d3il.zip
